# Supplementary material for: The evidence underpinning sports performance products: a systematic assessment
Source: PubMed Central journal article supplement — BMJ Open. 2012 Jul 18;2(4):e001702. doi: 10.1136/bmjopen-2012-001702 (PMC3401829; doi:10.1136/bmjopen-2012-001702), 2012-07-18
Supplement: bmjopen-2012-001702-s2.pdf [file bmjopen-2012-001702-s2.pdf]

**Table 1 Sports adverts study quality**

| <b>Study component</b>                                       | <b>N =74</b>     | <b>%<br/>(95% CI)</b>  |
|--------------------------------------------------------------|------------------|------------------------|
| Number of participants                                       | 2031 (Median 15) | Range<br>(5 to 387)    |
| Number of males                                              | 1310             | 64.5<br>(61.9 to 67.1) |
| <b>Study quality</b>                                         |                  |                        |
| Control Group                                                | 55               | 74.3<br>(62.8 to 85.9) |
| Randomization                                                | 43               | 58.1<br>(43.4 to 72.9) |
| Allocation Concealment                                       | 5                | 6.8<br>(0 to 28.8)     |
| Intention to treat                                           | 22               | 29.7<br>(10.8 to 48.8) |
| Blinding (investigators, outcome assessors, or participants) | 20               | 27.0<br>(7.6 to 46.5)  |
| Surrogate sports outcome                                     | 61               | 82.4<br>(72.9 to 92.0) |
| Repeat of the intervention                                   | 2                | 2.7<br>(0 to 25.2)     |
| <b>Reporting</b>                                             |                  |                        |
| Clear Hypothesis                                             | 66               | 89.2<br>(81.7 to 96.7) |
| Power Calculation                                            | 4                | 5.4<br>(0 to 27.6)     |
| Adverse events reported                                      | 6                | 6.8<br>(0 to 32.3)     |
| Study limitations discussed                                  | 8                | 10.8<br>(0 to 32.3)    |
| <b>Level of Evidence</b>                                     |                  |                        |
| 1                                                            | 0                | 0                      |
| 2                                                            | 32               | 42.1<br>(25.0 to 59.2) |
| 3                                                            | 33               | 43.4<br>(26.5 to 60.3) |
| 4 or 5                                                       | 9                | 11.8<br>(0 to 33.0)    |
